# Supplementary material for: Potential environmental impact of bromoform from Asparagopsis farming in Australia
Source: Copernicus journal article supplement (doi:10.5194/acp-2021-800), 2021-11-29
Supplement: Supplementary file 1 [file acp-2021-800-supplement.pdf]

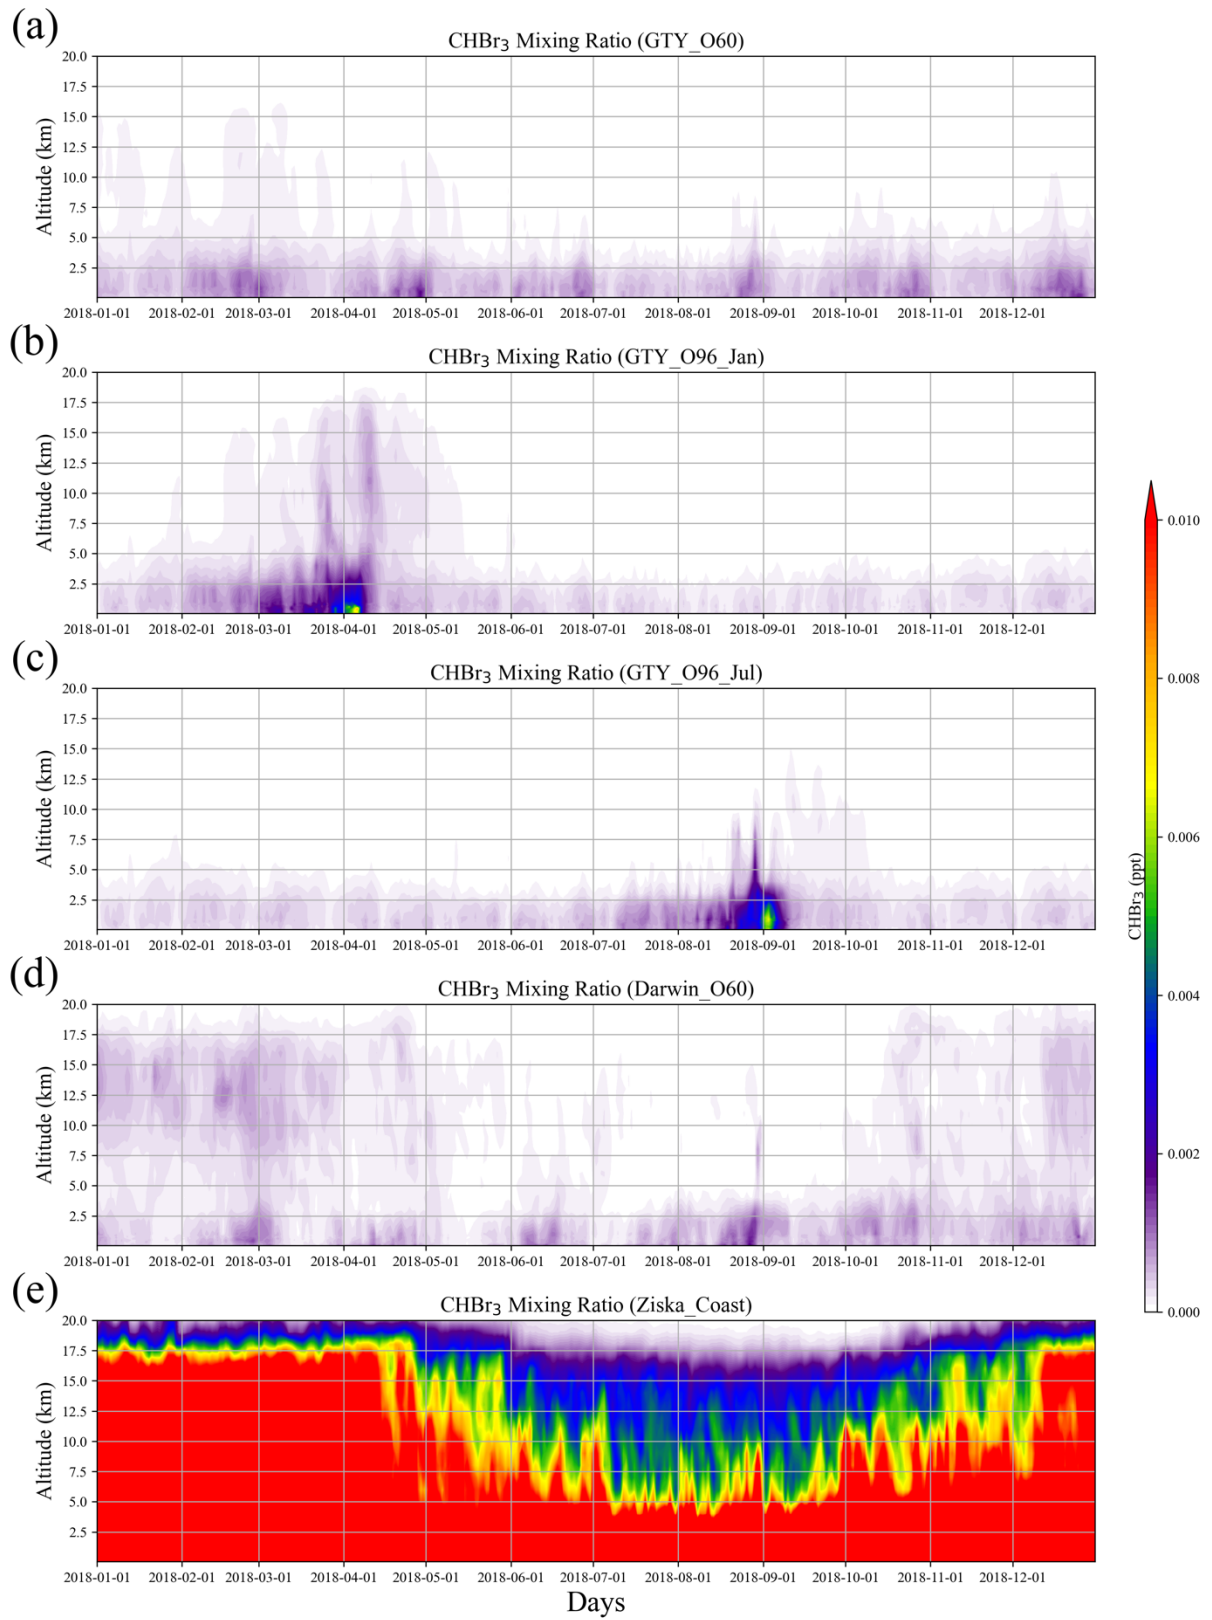

**Figure S1.** Altitude-time cross-sections of  $\text{CHBr}_3$  averaged over  $[10^\circ\text{-}45^\circ \text{ S}, 105^\circ\text{-}165^\circ \text{ E}]$  of  $\text{CHBr}_3$  mixing ratio from a) GTY\_O60, b) GTY\_O96\_Jan, c) GTY\_O96\_Jul, d) Darwin\_O60, and e) Ziska\_Coast.

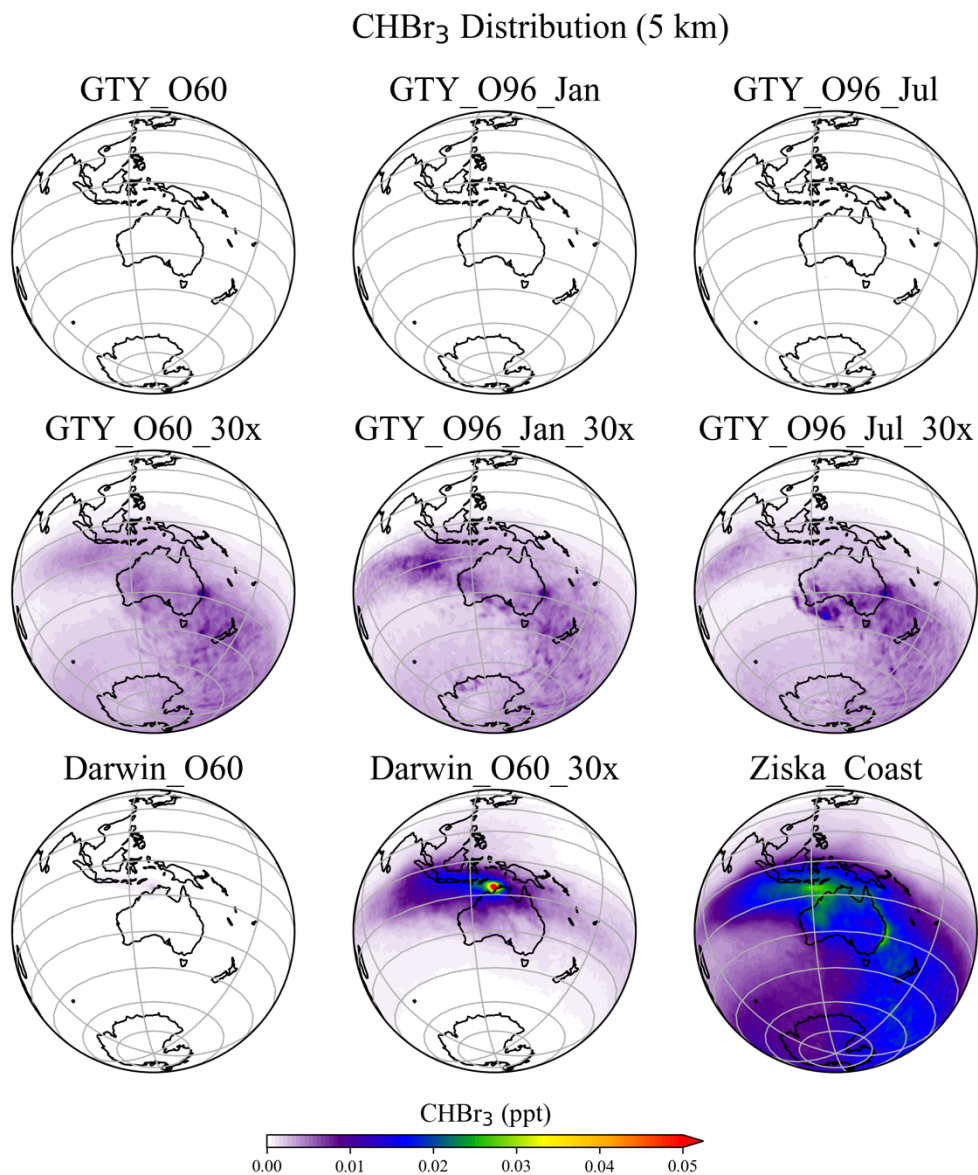

**Figure S2.** Annual mean  $\text{CHBr}_3$  spatial distribution from GTY\_O60, GTY\_O60\_30x, GTY1\_O96, GTY1\_O96\_30x, GTY2\_O96, GTY2\_O96\_30x, Darwin\_O60, Darwin\_O60\_30x, and Ziska\_Coast at 5 km altitude.

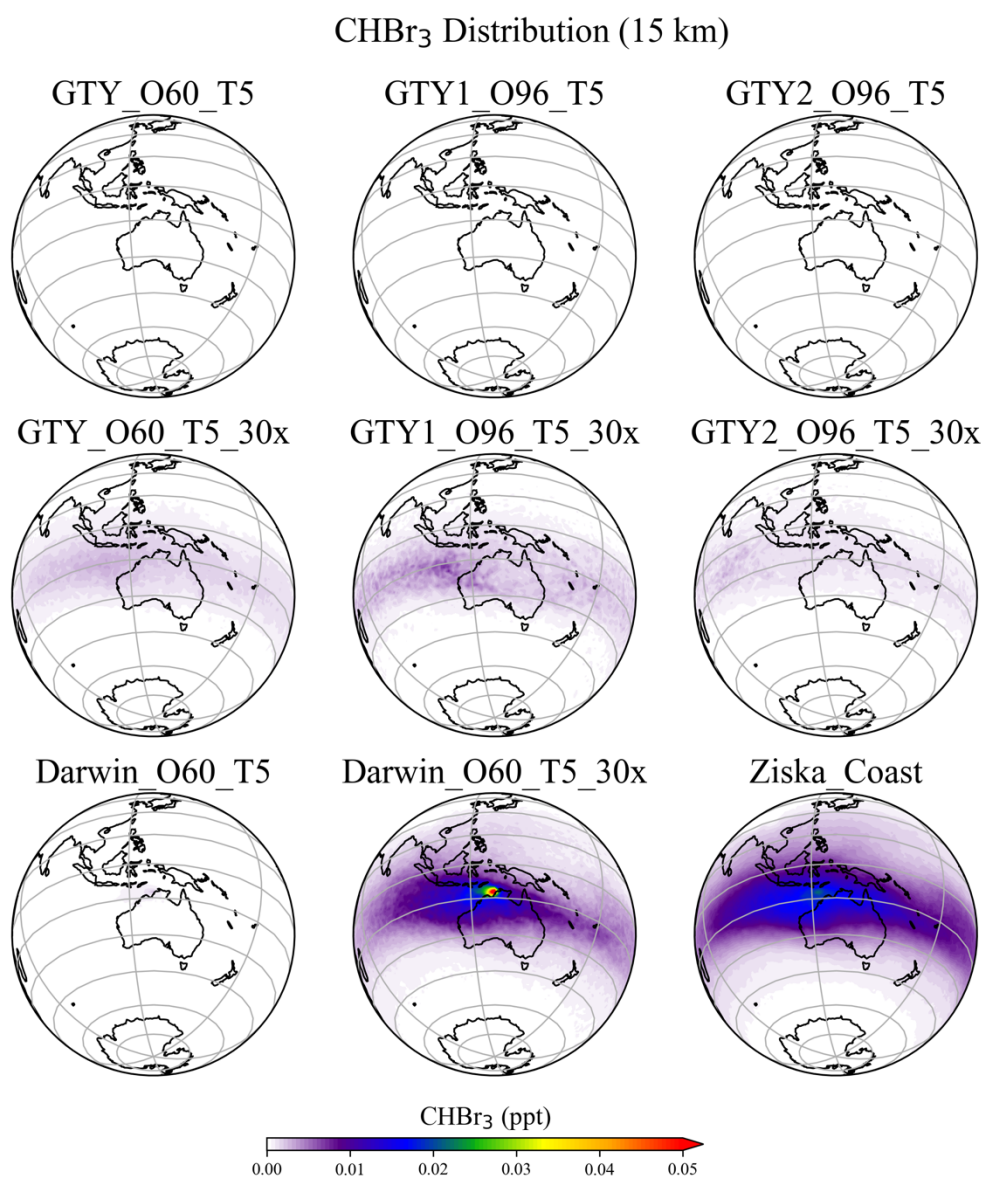

**Figure S3.** Same as Figure S2, but for 15 km.
